# Supplementary material for: A new [Co21(H2O)4(OH)12]30+ unit-incorporating polyoxotungstate for sensitive detection of dichlorvos
Source: Royal Society of Chemistry journal article supplement (doi:10.1039/d0nj01539c), 2020-01-01
Supplement: d0nj01539c1.pdf [file d0nj01539c1.pdf]

*Electronic Supplementary Information*

**A new  $[\text{Co}_{21}(\text{H}_2\text{O})_4(\text{OH})_{12}]^{30+}$  unit incorporated polyoxotungstate for  
sensitive detection of dichlorvos**

Dongying Shi,\* Chao-Jie Cui, Chun-Xiao Sun, Jun-Ping Du and Chun-Sen Liu\*

*Henan Provincial Key Laboratory of Surface & Interface Science, Zhengzhou  
University of Light Industry, Zhengzhou 450002, P. R. China*

Authors for correspondence: shidongying@zzuli.edu.cn; chunsenliu@zzuli.edu.cn

**Contents**

**Section S1 X-ray crystallography**

**Section S2 Characterization of  $\text{Co}_{25}\text{Si}_6\text{W}_{60}$**

**Section S3 Electrochemical measurements**

**Section S4 Comparisons between this work and other works**

**Section S5 References**

## Section S1 X-ray crystallography

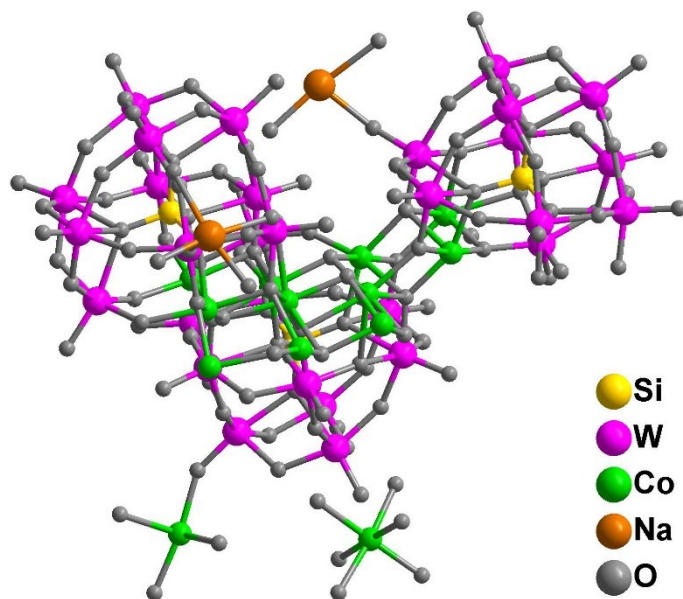

Fig. S1 Ball-and-stick representation of  $\text{Co}_{25}\text{Si}_6\text{W}_{60}$  in an asymmetric unit.

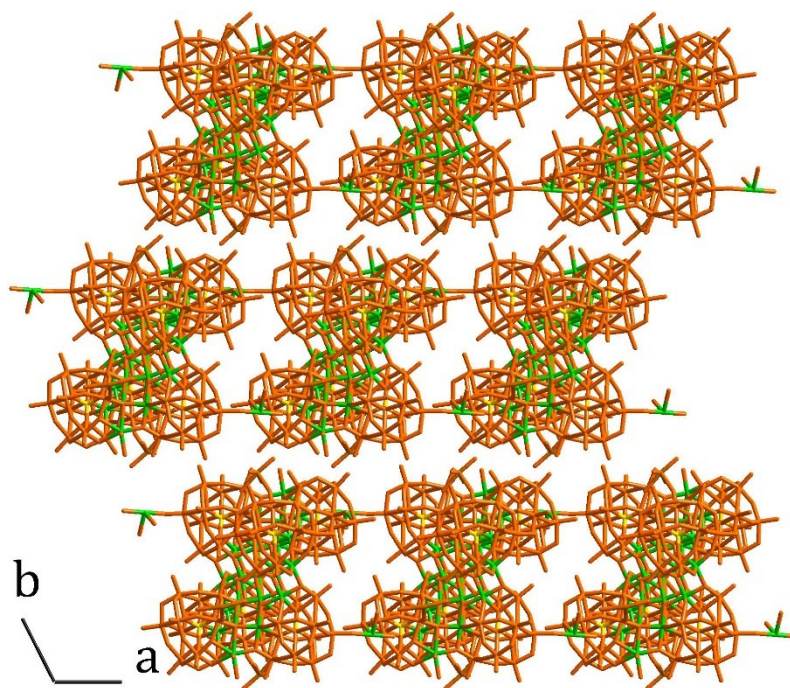

Fig. S2 View of the packing arrangement of  $\text{Co}_{25}\text{Si}_6\text{W}_{60}$  along the  $c$  direction.

**Table S1** Crystallographic data and structure refinement for **Co<sub>25</sub>Si<sub>6</sub>W<sub>60</sub>**.

| <b>Co<sub>25</sub>Si<sub>6</sub>W<sub>60</sub></b>                                                                  |                                                                                                     |
|---------------------------------------------------------------------------------------------------------------------|-----------------------------------------------------------------------------------------------------|
| Empirical formula                                                                                                   | Na <sub>22</sub> O <sub>292</sub> H <sub>128</sub> Co <sub>25</sub> Si <sub>6</sub> W <sub>60</sub> |
| <i>M</i> , g·mol <sup>-1</sup>                                                                                      | 17978.85                                                                                            |
| Crystal system                                                                                                      | Triclinic                                                                                           |
| Space group                                                                                                         | <i>P</i> -1                                                                                         |
| <i>a</i> , Å                                                                                                        | 19.9421(6)                                                                                          |
| <i>b</i> , Å                                                                                                        | 23.2514(8)                                                                                          |
| <i>c</i> , Å                                                                                                        | 24.8961(8)                                                                                          |
| <i>α</i> , deg                                                                                                      | 98.678(3)                                                                                           |
| <i>β</i> , deg                                                                                                      | 110.845(3)                                                                                          |
| <i>γ</i> , deg                                                                                                      | 111.285(3)                                                                                          |
| <i>V</i> , Å <sup>3</sup>                                                                                           | 9518.3(5)                                                                                           |
| <i>Z</i>                                                                                                            | 1                                                                                                   |
| <i>D</i> <sub>calcd.</sub> , g·cm <sup>-3</sup>                                                                     | 3.052                                                                                               |
| <i>T</i> , K                                                                                                        | 293(2)                                                                                              |
| Refl. collected/unique                                                                                              | 67770/37178 ( <i>R</i> <sub>int</sub> = 0.0746)                                                     |
| <i>μ</i> , mm <sup>-1</sup>                                                                                         | 41.753                                                                                              |
| GOF                                                                                                                 | 1.019                                                                                               |
| <i>R</i> <sub>1</sub> <sup><i>a</i></sup> / <i>wR</i> <sub>2</sub> <sup><i>b</i></sup> ( <i>I</i> > 2σ( <i>I</i> )) | 0.0910 / 0.2525                                                                                     |
| <i>R</i> <sub>1</sub> <sup><i>a</i></sup> , <i>wR</i> <sub>2</sub> <sup><i>b</i></sup> (all data)                   | 0.1491 / 0.3022                                                                                     |
| Diff peak and hole, e·Å <sup>-3</sup>                                                                               | 4.946 / -3.169                                                                                      |

<sup>*a*</sup>  $R_1 = \sum ||F_o| - |F_c|| / \sum |F_o|$ . <sup>*b*</sup>  $wR_2 = [\sum w(F_o^2 - F_c^2)^2 / \sum w(F_o^2)^2]^{1/2}$ ;  $w = 1/[\sigma^2(F_o^2) + (0.1727P)^2 + 0.0000P]$ ;  $P = (F_o^2 + 2F_c^2)/3$ .

## Section S2 Characterization of $\text{Co}_{25}\text{Si}_6\text{W}_{60}$

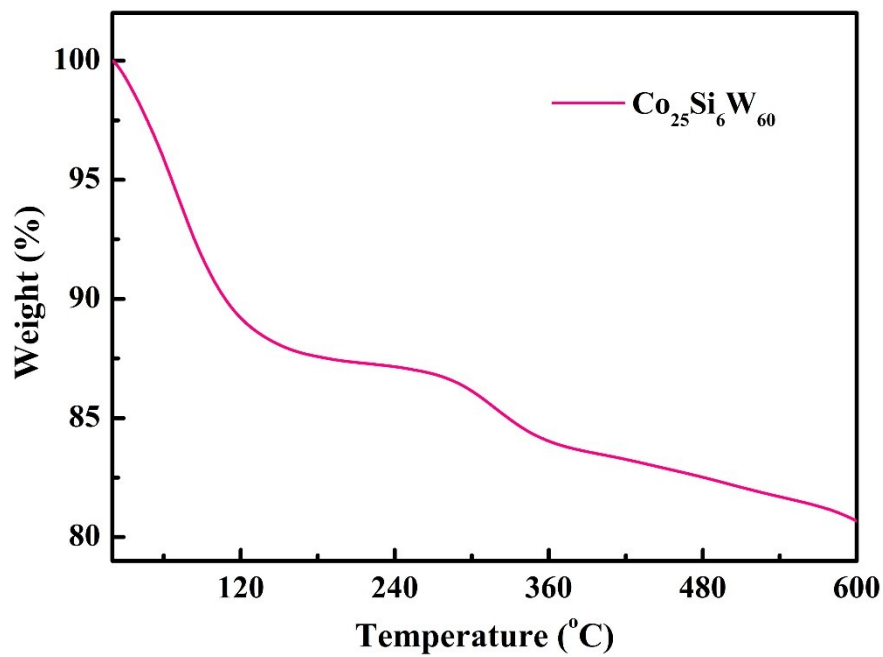

Fig. S3 The TGA curve of  $\text{Co}_{25}\text{Si}_6\text{W}_{60}$  under flowing  $\text{N}_2$  atmosphere.

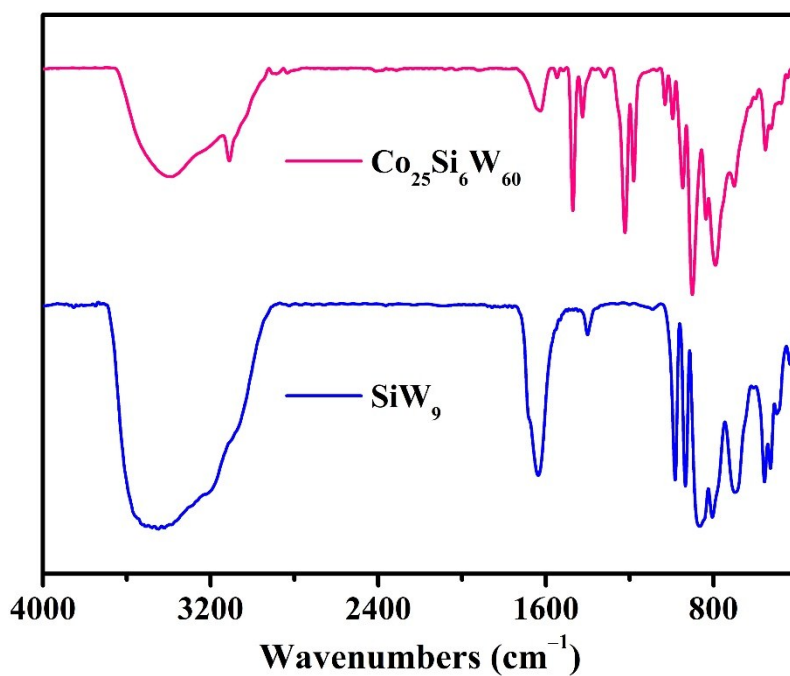

Fig. S4 The IR spectra of  $\text{Co}_{25}\text{Si}_6\text{W}_{60}$  and  $\text{SiW}_9$ .

### Section S3 Electrochemical measurements

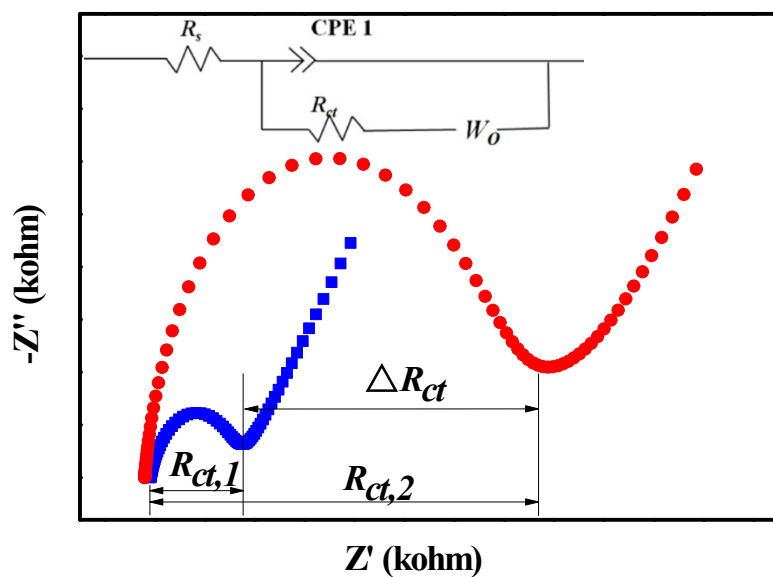

Fig. S5 EIS Nyquist plots and equivalent circuit.

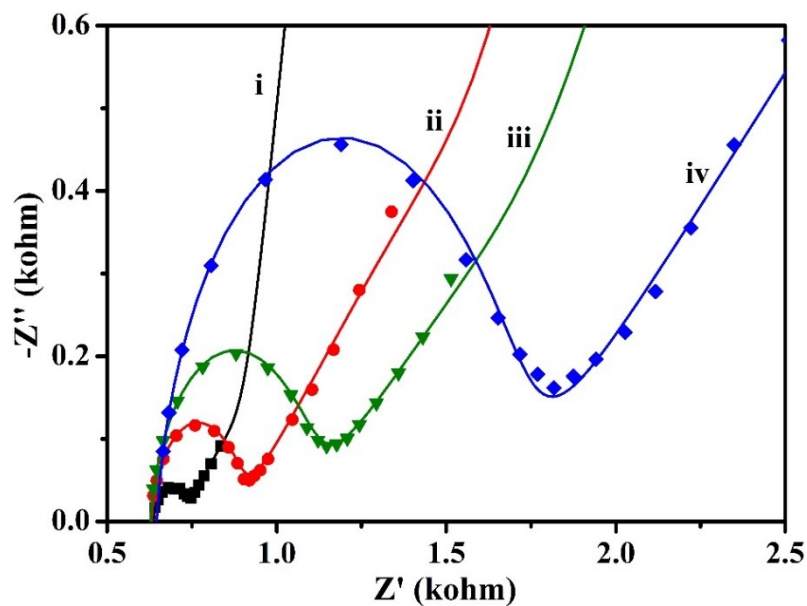

Fig. S6 EIS Nyquist plots for detecting DDV using the developed electrochemical biosensor based on  $\text{Co}_{25}\text{Si}_6\text{W}_{60}$  POM in 5 mM  $[\text{Fe}(\text{CN})_6]^{3-/4-}$  (0.1 M PBS, pH 7.4) containing 0.14 M NaCl and 1 M KCl: (i) bare AE, (ii)  $\text{Co}_{25}\text{Si}_6\text{W}_{60}/\text{AE}$ , (iii)  $\text{AChE}/\text{Co}_{25}\text{Si}_6\text{W}_{60}/\text{AE}$ , and (iv)  $\text{DDV}/\text{AChE}/\text{Co}_{25}\text{Si}_6\text{W}_{60}/\text{AE}$ .

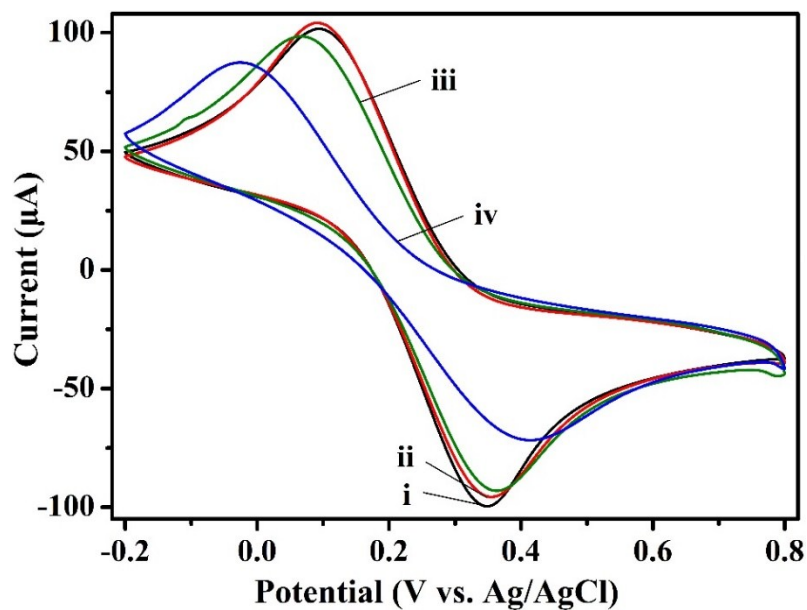

**Fig. S7** CV curves for detecting DDV using the developed electrochemical biosensor based on  $\text{Co}_{25}\text{Si}_6\text{W}_{60}$  POM in 5 mM  $[\text{Fe}(\text{CN})_6]^{3-/4-}$  (0.1 M PBS, pH 7.4) containing 0.14 M NaCl and 1 M KCl: (i) bare AE, (ii)  $\text{Co}_{25}\text{Si}_6\text{W}_{60}/\text{AE}$ , (iii)  $\text{AChE}/\text{Co}_{25}\text{Si}_6\text{W}_{60}/\text{AE}$ , and (iv)  $\text{DDV}/\text{AChE}/\text{Co}_{25}\text{Si}_6\text{W}_{60}/\text{AE}$ .

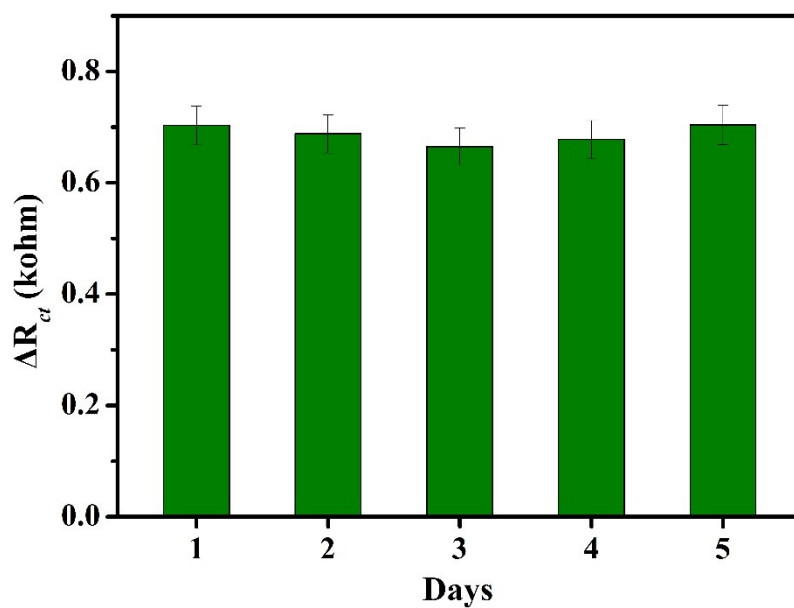

**Fig. S8** Stability of the  $\text{Co}_{25}\text{Si}_6\text{W}_{60}$ -based electrochemical biosensor for detecting DDV ( $0.001 \text{ ng} \cdot \text{mL}^{-1}$ ).

**Table S2** Determination of DDV in Top-water by the  $\text{Co}_{25}\text{Si}_6\text{W}_{60}$ -based biosensor.

| <b>Added (<math>\text{ng}\cdot\text{mL}^{-1}</math>)</b> | <b>Found (<math>\text{ng}\cdot\text{mL}^{-1}</math>)</b> | <b>Apparent recovery (%)</b> | <b>RSD (%)</b> |
|----------------------------------------------------------|----------------------------------------------------------|------------------------------|----------------|
| 1.0                                                      | 1.00                                                     | 100.0                        | 1.3            |
| 5.0                                                      | 4.90                                                     | 98.0                         | 0.6            |
| 10.0                                                     | 10.2                                                     | 102.0                        | 0.5            |
| 50.0                                                     | 51.1                                                     | 102.2                        | 0.3            |
| 100.0                                                    | 102.3                                                    | 102.3                        | 0.3            |

## Section S4 Comparisons between this work and other works

**Table S3** Comparisons of the proposed method with other DDV-detection methods.

| Entry | Materials                                                              | Detection method                            | Line range                                               | LOD                                           |
|-------|------------------------------------------------------------------------|---------------------------------------------|----------------------------------------------------------|-----------------------------------------------|
| 1     | <b>Co<sub>25</sub>Si<sub>6</sub>W<sub>60</sub><br/>(this work)</b>     | <b>EIS</b>                                  | <b>0.001–0.5<br/>ng·mL<sup>-1</sup></b>                  | <b>0.30<br/>pg·mL<sup>-1</sup></b>            |
| 2     | Quenchbody <sup>1</sup>                                                | Chromatographic<br>analysis                 | 0.1–50.0<br>μg·mL <sup>-1</sup>                          | 0.003<br>mg·kg <sup>-1</sup>                  |
| 3     | Quenchbody <sup>2</sup>                                                | Chromatographic<br>analysis                 | 0.06–2.4<br>μg·L <sup>-1</sup>                           | 0.016 μg·L <sup>-1</sup><br><sup>1</sup>      |
| 4     | QDs-nano-ZnTPyP <sup>3</sup>                                           | Observe the change<br>in fluorescence color | 1–50 μg·L <sup>-1</sup>                                  | poor                                          |
| 5     | Graphene quantum dots <sup>4</sup>                                     | Luminescence                                | 0.45–45.25<br>μM                                         | 0.778 μM                                      |
| 6     | CS@TiO <sub>2</sub> -CS/rGO <sup>5</sup>                               | EIS                                         | 0.036–22.6<br>μM                                         | 29 nM                                         |
| 7     | Quenchbody <sup>6</sup>                                                | Chromatographic<br>analysis                 | 58.8–225.5<br>ng·g <sup>-1</sup>                         | 7.3 ng·g <sup>-1</sup>                        |
| 8     | Quenchbody <sup>7</sup>                                                | Matrix solid-phase<br>dispersion            | 0.2–2.6<br>μg·kg <sup>-1</sup>                           | 1.4 μg·kg <sup>-1</sup>                       |
| 9     | Zinc oxide nanospheres <sup>8</sup>                                    | cyclic voltammetry                          | Not reported                                             | 0.012 nM                                      |
| 10    | [BSmim]HSO <sub>4</sub> -AuNPs-porous<br>carbon composite <sup>9</sup> | EIS                                         | 10 <sup>-10</sup> –10 <sup>-6</sup><br>g·L <sup>-1</sup> | 6.61 × 10 <sup>-11</sup><br>g·L <sup>-1</sup> |
| 11    | Quenchbody <sup>10</sup>                                               | Chromatographic<br>analysis                 | 0.05–30<br>ng·mL <sup>-1</sup>                           | 10 pg·mL <sup>-1</sup>                        |
| 12    | Poly(4-aminophenol) modified<br>graphite <sup>11</sup>                 | EIS                                         | 0.5–10<br>mmol·L <sup>-1</sup>                           | 0.8<br>μmol·L <sup>-1</sup>                   |
| 13    | Al <sub>2</sub> O <sub>3</sub> sol-gel <sup>12</sup>                   | Amperometric                                | 0.1–80 μM                                                | 10 nM                                         |
| 14    | Chromoionophore<br>in sol-gel films <sup>13</sup>                      | Optical mode                                | 0.5–7 mg·L <sup>-1</sup><br><sub>1</sub>                 | 0.5 mg·L <sup>-1</sup>                        |



## Section S5 References

- 1 X. Qin, X. Luo, Y. Chen, J. Han, J. Zhang, K. Zhang and D. Hu, *Biomed. Chromatogr.*, 2019, **33**, 4537.
- 2 Q. T. Nguyen, C. Douny, M. P. Tran, F. Brose, P. T. Nguyen, D. T. T. Huong, P. Kestemont and M.-L. Scippo, *Aquac. Res.*, 2019, **50**, 247–255.
- 3 Q. Wang, Q. Yin, Y. Fan, L. Zhang, Y. Xu, O. Hu, X. Guo, Q. Shi, H. Fu and Y. She, *Talanta*, 2019, **199**, 46–53.
- 4 C. Sahub, T. Tuntulani, T. Nhujak and B. Tomapatanaget, *Sensor. Actuat. B-Chem.*, 2018, **258**, 88–97.
- 5 H.-F. Cui, W.-W. Wu, M.-M. Li, X. Song, Y. Lv and T.-T. Zhang, *Biosen. Bioelectron.*, 2018, **99**, 223–229.
- 6 A. Kumar, J. P. S. Gill, J. S. Bedi and A. Kumar, *Environ. Sci. Pollut. R.*, 2018, **25**, 34005–34016.
- 7 K. Medina-Dzul, S. Medina-Peralta, C. Carrera-Figueiras, M. Sánchez and D. Muñoz-Rodríguez, *Int. J. Environ. An. Ch.*, 2017, 1–10.
- 8 R. Sundarmurugasan, M. B. Gumpu, B. L. Ramachandra, N. Nesakumar, S. Sethuraman, U. M. Krishnan and J. B. B. Rayappan, *Sensor. Actuat. B-Chem.*, 2016, **230**, 306–313.
- 9 M. Wei and J. Wang, *Sensor. Actuat. B-Chem.*, 2015, **211**, 290–296.
- 10 L. Yin, X. Meng, X. Zhou, T. Zhang, H. Sun, Z. Yang, B. Yang, N. Xiao, J. P. Fawcett, Y. Yang and J. Gu, *J. Chromatogr. B*, 2015, **998–999**, 8–14.
- 11 E. I. Melo, D. L. Franco, A. S. Afonso, H. C. Rezende, A. G. Brito-Madurro, J. M. Madurro and N. M. M. Coelho, *Braz. Arch. Biol. Technol.*, 2011, **54**, 1217–1222.
- 12 M. Shi, J. Xu, S. Zhang, B. Liu and J. Kong, *Talanta*, 2006, **68**, 1089–1095.
- 13 F. Wong, M. Ahmad, L. Y. Heng, L. B. Peng, *Talanta*, 2006, **69**, 888–893.
